# Supplementary material
Source: PubMed Central journal article supplement (PMC7009602)
Supplement: awz403_supplementary_figures.pdf [file awz403_supplementary_figures.pdf]

**Supplementary Figure 1. Spaghetti plots of CDR-SB and cognitive domain z-scores by UDS visit for participants with mild cognitive impairment (CDR=0.5) at baseline and primary age related tauopathy versus Alzheimer disease at autopsy**

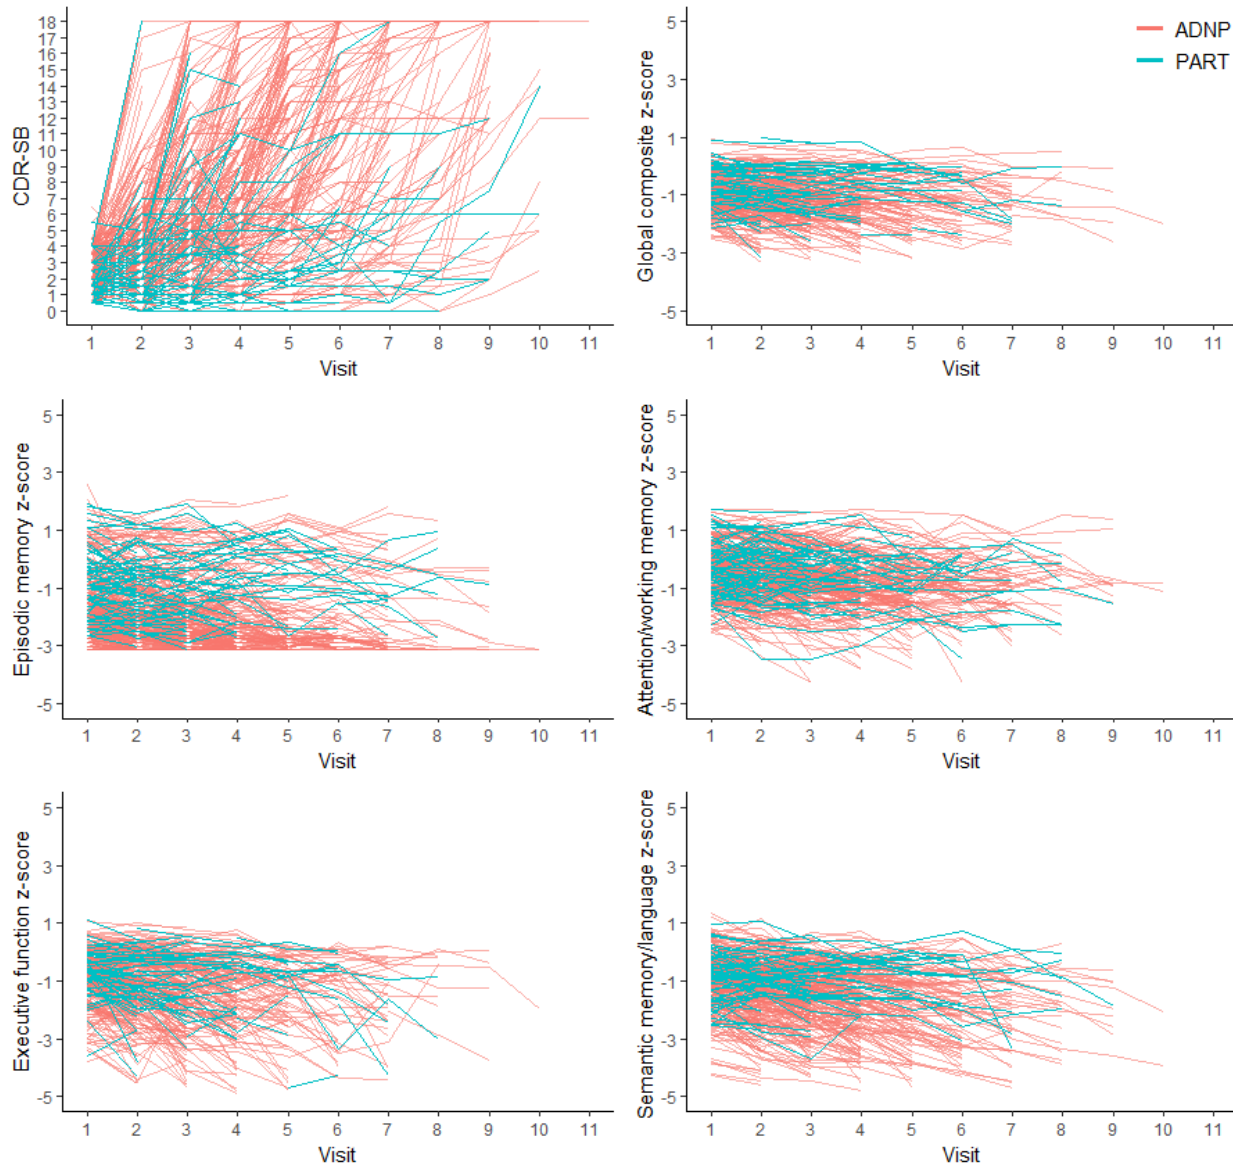

**Supplementary Table 1. Adjusted models for CDR-SB by prevalent and incident MCI cases of primary age related tauopathy versus Alzheimer disease**

| Score  | Sample    | Number of participant visits | Annual rate of change (Adjusted) <sup>a</sup> |              |       |              | Annual difference between PART and AD <sup>b</sup> |              |         |
|--------|-----------|------------------------------|-----------------------------------------------|--------------|-------|--------------|----------------------------------------------------|--------------|---------|
|        |           |                              | PART                                          |              | AD    |              | β est                                              | 95% CI       | p-value |
|        |           |                              | β est                                         | 95% CI       | β est | 95% CI       |                                                    |              |         |
| CDR-SB | Total     | 2424                         | 0.74                                          | (0.49, 0.98) | 1.80  | (1.63, 1.96) | 1.06                                               | (0.83, 1.29) | <0.001  |
|        | Prevalent | 1856                         | 0.90                                          | (0.50, 1.29) | 1.86  | (1.68, 2.03) | 0.96                                               | (0.57, 1.35) | <0.001  |
|        | Incident  | 568                          | 0.51                                          | (0.26, 0.76) | 1.51  | (1.22, 1.79) | 1.00                                               | (0.73, 1.27) | <0.001  |

<sup>a</sup> Interpretation: a positive β estimate and a 95% CI that does not include zero indicates significant decline.

<sup>b</sup> Interpretation: a positive difference indicates PART is declining at a slower rate than AD.

<sup>c</sup> Adjusting for baseline score, sex, age at baseline, education, Braak stage, APOE ε4 carrier status, family history of cognitive impairment, history of stroke, hypertension, or diabetes.

**Supplementary Table 2. Alternative adjusted models comparing primary age-related tauopathy versus Alzheimer’s disease in participants with mild cognitive impairment (CDR=0.5) at baseline, where clinical history of cardiovascular risk factors are replaced with autopsy evidence of vascular brain injury**

| Score                    | Number of participant visits | Annual rate of change (Adjusted) <sup>a</sup> |                |       |                | Annual difference between PART and AD <sup>b</sup> |                |         |
|--------------------------|------------------------------|-----------------------------------------------|----------------|-------|----------------|----------------------------------------------------|----------------|---------|
|                          |                              | PART                                          |                | AD    |                | β est                                              | 95% CI         | p-value |
|                          |                              | β est                                         | 95% CI         | β est | 95% CI         |                                                    |                |         |
| CDR-SB                   | 2443                         | 0.71                                          | (0.47, 0.95)   | 1.80  | (1.64, 1.97)   | 1.10                                               | (0.87, 1.32)   | <0.001  |
| Global composite         | 1316                         | -0.12                                         | (-0.16, -0.07) | -0.26 | (-0.29, -0.22) | -0.14                                              | (-0.19, -0.09) | <0.001  |
| Episodic memory          | 1821                         | -0.08                                         | (-0.13, -0.02) | -0.21 | (-0.26, -0.17) | -0.14                                              | (-0.21, -0.06) | <0.001  |
| Attention/working memory | 1892                         | -0.06                                         | (-0.09, -0.02) | -0.18 | (-0.21, -0.16) | -0.12                                              | (-0.16, -0.09) | <0.001  |
| Executive function       | 1375                         | -0.21                                         | (-0.28, -0.13) | -0.40 | (-0.45, -0.36) | -0.20                                              | (-0.28, -0.11) | <0.001  |
| Semantic memory/language | 1828                         | -0.13                                         | (-0.16, -0.10) | -0.35 | (-0.39, -0.31) | -0.22                                              | (-0.26, -0.18) | <0.001  |

<sup>a</sup> Interpretation: a negative β estimate and a 95% CI that does not include zero indicates significant decline with the exception of CDR-SB, where a positive β estimate and a 95% CI that does not include zero indicates significant decline.

<sup>b</sup> Interpretation: a negative difference indicates PART is declining at a slower rate than AD except for CDR-SB where a positive difference indicates PART is declining at a slower rate than AD.

<sup>c</sup> Adjusting for sex, age at baseline, education, baseline test score, Braak stage, APOE ε4 carrier status, family history of cognitive impairment, evidence of vascular brain injury at autopsy. Vascular brain injury is a binary variable that includes the presence of hemorrhage, microbleed, infarct/lacune, or microinfarct.

**Supplementary Table 3. Alternative adjusted models comparing primary age-related tauopathy versus Alzheimer’s disease in participants with mild cognitive impairment (CDR=0.5) at baseline, where Braak stage is removed as a covariate**

| Score                    | Number of participant visits | Annual rate of change (Adjusted) <sup>a</sup> |                |       |                | Annual difference between PART and AD <sup>b</sup> |                |         |
|--------------------------|------------------------------|-----------------------------------------------|----------------|-------|----------------|----------------------------------------------------|----------------|---------|
|                          |                              | PART                                          |                | AD    |                | β est                                              | 95% CI         | p-value |
|                          |                              | β est                                         | 95% CI         | β est | 95% CI         |                                                    |                |         |
| CDR-SB                   | 2431                         | 0.72                                          | (0.48, 0.97)   | 1.80  | (1.64, 1.97)   | 1.08                                               | (0.85, 1.30)   | <0.001  |
| Global composite         | 1309                         | -0.11                                         | (-0.16, -0.07) | -0.26 | (-0.29, -0.23) | -0.14                                              | (-0.19, -0.10) | <0.001  |
| Episodic memory          | 1811                         | -0.07                                         | (-0.13, -0.01) | -0.21 | (-0.26, -0.17) | -0.14                                              | (-0.22, -0.06) | <0.001  |
| Attention/working memory | 1882                         | -0.06                                         | (-0.09, -0.02) | -0.18 | (-0.21, -0.16) | -0.13                                              | (-0.16, -0.09) | <0.001  |
| Executive function       | 1368                         | -0.20                                         | (-0.28, -0.13) | -0.40 | (-0.45, -0.36) | -0.20                                              | (-0.28, -0.11) | <0.001  |
| Semantic memory/language | 1818                         | -0.13                                         | (-0.16, -0.10) | -0.35 | (-0.39, -0.31) | -0.22                                              | (-0.27, -0.18) | <0.001  |

<sup>a</sup> Interpretation: a negative β estimate and a 95% CI that does not include zero indicates significant decline with the exception of CDR-SB, where a positive β estimate and a 95% CI that does not include zero indicates significant decline.

<sup>b</sup> Interpretation: a negative difference indicates PART is declining at a slower rate than AD except for CDR-SB where a positive difference indicates PART is declining at a slower rate than AD.

<sup>c</sup> Adjusting for sex, age at baseline, education, baseline test score, APOE ε4 carrier status, family history of cognitive impairment, history of stroke, hypertension, or diabetes

**Supplementary Table 4. Adjusted models examining Alzheimer’s disease participants with mild cognitive impairment (CDR=0.5) at baseline, comparing those with Thal phase 1-3 versus Thal phase 4-5**

| Model <sup>c</sup> | Score                    | Number of participant visits | Annual rate of change (Adjusted) <sup>a</sup> |                 |                        |                | Annual difference between AD with Thal phase 1-3 and 4-5 <sup>b</sup> |                |         |
|--------------------|--------------------------|------------------------------|-----------------------------------------------|-----------------|------------------------|----------------|-----------------------------------------------------------------------|----------------|---------|
|                    |                          |                              | AD with Thal phase 1-3                        |                 | AD with Thal phase 4-5 |                | β est                                                                 | 95% CI         | p-value |
|                    |                          |                              | β est                                         | 95% CI          | β est                  | 95% CI         |                                                                       |                |         |
| Model 1            | CDR-SB                   | 1156                         | 1.38                                          | (0.86, 1.89)    | 1.75                   | (1.56, 1.93)   | 0.37                                                                  | (-0.16, 0.90)  | 0.17    |
|                    | Global composite         | 624                          | -0.16                                         | (-0.21, -0.10)  | -0.24                  | (-0.28, -0.21) | -0.08                                                                 | (-0.15, -0.02) | 0.008   |
|                    | Episodic memory          | 825                          | -0.12                                         | (-0.23, -0.01)  | -0.19                  | (-0.23, -0.15) | -0.07                                                                 | (-0.18, 0.04)  | 0.21    |
|                    | Attention/working memory | 843                          | -0.12                                         | (-0.18, -0.06)  | -0.18                  | (-0.20, -0.15) | -0.06                                                                 | (-0.13, 0.01)  | 0.10    |
|                    | Executive function       | 641                          | -0.27                                         | (-0.35, -0.18)  | -0.39                  | (-0.44, -0.33) | -0.12                                                                 | (-0.20, -0.03) | 0.007   |
|                    | Semantic memory/language | 824                          | -0.25                                         | (-0.35, -0.16)  | -0.35                  | (-0.41, -0.30) | -0.10                                                                 | (-0.21, 0.01)  | 0.09    |
| Model 2            | CDR-SB                   | 1156                         | 1.38                                          | (0.86, 1.89)    | 1.75                   | (1.56, 1.93)   | 0.37                                                                  | (-0.16, 0.90)  | 0.17    |
|                    | Global composite         | 624                          | -0.16                                         | (-0.21, -0.10)  | -0.24                  | (-0.28, -0.21) | -0.08                                                                 | (-0.15, -0.02) | 0.008   |
|                    | Episodic memory          | 825                          | -0.12                                         | (-0.23, -0.005) | -0.19                  | (-0.23, -0.15) | -0.07                                                                 | (-0.18, 0.04)  | 0.21    |
|                    | Attention/working memory | 843                          | -0.12                                         | (-0.18, -0.06)  | -0.18                  | (-0.20, -0.15) | -0.06                                                                 | (-0.13, 0.01)  | 0.10    |
|                    | Executive function       | 641                          | -0.27                                         | (-0.35, -0.19)  | -0.39                  | (-0.44, -0.33) | -0.12                                                                 | (-0.20, -0.03) | 0.007   |
|                    | Semantic memory/language | 824                          | -0.25                                         | (-0.35, -0.16)  | -0.35                  | (-0.41, -0.30) | -0.10                                                                 | (-0.21, 0.01)  | 0.09    |

<sup>a</sup> Interpretation: a negative β estimate and a 95% CI that does not include zero indicates significant decline with the exception of CDR-SB, where a positive β estimate and a 95% CI that does not include zero indicates significant decline.

<sup>b</sup> Interpretation: a negative difference indicates AD with Thal phase 1-3 is declining at a slower rate than AD with Thal phase 4-5 except for CDR-SB where a positive difference indicates AD with Thal phase 1-3 is declining at a slower rate than AD with Thal phase 4-5.

<sup>c</sup> Model 1: Adjusting for sex, age at baseline, education, baseline test score, APOE ε4 carrier status, family history of cognitive impairment, history of stroke, hypertension, or diabetes, and Braak stage

Model 2: Adjusting for sex, age at baseline, education, baseline test score, APOE ε4 carrier status, family history of cognitive impairment, history of stroke, hypertension, or diabetes
